# Supplementary material
Source: PubMed Central journal article supplement (PMC4835258)
Supplement: NIHMS757052-supplement-01.pdf [file NIHMS757052-supplement-01.pdf]

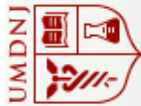

## Overview

Welcome and thank you for your interest in connecting with others and sharing your ideas using Care Coordinator. On this website, we'll be discussing your experiences, thoughts and opinions about your role as a care coordinator in a primary care office. We want to learn about your role as a care coordinator, what has worked or has not worked for you, and what might be done to improve your experiences. Before you begin, please read the general instructions page, which includes our community guidelines. Thank you for your participation. We look forward to a very productive discussion.

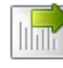

## Resources

The resources tab is for sharing documents with the group such as manuals, articles, spreadsheets or other resources pertinent to care coordination. Click "view resources" below to view the documents already submitted or submit your own materials for others to view!

[View Resources](#)

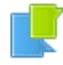

## Discussion Forum

This is the main discussion page. "Topics of discussion" contains all posted topics by users just like you. Click on a topic to view and respond to the question or someone else's comment.

The "Researcher's Analysis" summarizes information that has been found from what Care Coordinator research administrators are learning from your, and other Care Coordinator user's, discussions.

[View Discussions](#)

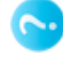

## FAQ

Have questions about how Care Coordinator works, or what the application can do? Check out the Frequently Asked Questions page! Press on the plus and minus icons to show and hide the answers.

[View Questions](#)
