# Supplementary material
Source: PubMed Central journal article supplement (PMC4835258)
Supplement: NIHMS757052-supplement-02.pdf [file NIHMS757052-supplement-02.pdf]

## Discussion Forums

 [SUBMIT TOPIC FOR DISCUSSION](#)

 [STATUS OF SUBMITTED TOPICS](#)

| Topics for Discussion                                                     | Last Post |
|---------------------------------------------------------------------------|-----------|
| RN Case Manager programs: I really love my job, and have been fin...      | 4/5/2012  |
| Psychological/personality disorders: Several of you mentioned that p...   | 3/21/2012 |
| Relationships with physicians: Several of you have voiced your strug...   | 3/21/2012 |
| As we move into our third month of discussions, what other topics w...    | 3/23/2012 |
| Population Health Management programs use strategies to target def...     | 3/9/2012  |
| I'd like to know how other Care Coordinators measure their *succes...     | 3/16/2012 |
| Team care: CarrieT and StephanieS mentioned frustrations with MD...       | 2/24/2012 |
| Patient selection follow-up: Based on our recent analysis on patient s... | 2/21/2012 |
| What strategies or tools are you and your organization using to redu...   | 3/6/2012  |
| Patient engagement: ErinT and LizeteS mentioned that it can be chall...   | 2/24/2012 |

Previous
1
2
3
Next

| Researcher's Analysis                                                                                                                              | Last Post |
|----------------------------------------------------------------------------------------------------------------------------------------------------|-----------|
| Congratulations to the final winners of gift cards for having th...                                                                                | 6/4/2012  |
| Congratulations to CarrieT for being randomly selected as th...                                                                                    | 5/1/2012  |
| Some of you have mentioned specific resources in your post...                                                                                      | 4/19/2012 |
| Team care and relationships with physicians: Your comment...                                                                                       | 4/25/2012 |
| Congratulations to LynnK for being randomly selected as the ...                                                                                    | 4/5/2012  |
| Reducing hospital admissions/ED visits: Several of you menti...                                                                                    | 3/28/2012 |
| Patient engagement: It sounds like the key to engaging patie...                                                                                    | 3/23/2012 |
| New resource added today. We wanted to let everyone kno...                                                                                         | 3/5/2012  |
| Congratulations to StephanieS for being randomly selected a...                                                                                     | 2/29/2012 |
|  Our apologies for the errors in the practice information do... | 2/27/2012 |
| Magic wand analysis: Many of you voiced the desire for othe...                                                                                     | 3/5/2012  |
| Patient selection: It appears the majority of patients are selec...                                                                                | 2/14/2012 |
| Training: A couple of weeks ago, Eleanor C asked a question...                                                                                     | 3/20/2012 |
| Timing out: We are sorry that some people have lost their po...                                                                                    | 2/9/2012  |
| Congratulations to LeahR for being randomly selected as th...                                                                                      | 2/23/2012 |
| When position was created: it seems the majority of care coo...                                                                                    | 2/17/2012 |
| Add a picture of yourself or an image you like! For all of you ...                                                                                 | 1/19/2012 |
| You are an interesting group! We appreciate all you've share...                                                                                    | 3/6/2012  |
