# Supplementary material
Source: PubMed Central journal article supplement (PMC4835258)
Supplement: NIHMS757052-supplement-03.pdf [file NIHMS757052-supplement-03.pdf]

## Reports

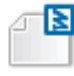

### Download Document of Questions and Comments

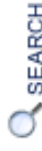

Congratulations to the final winners of gift cards for having the most points during this entire discussion forum! It was very close among the top three. CarlaB will receive \$100, LellianV will receive \$75, and EleanorC will receive a \$50 American Express gift card. Thank you for your feedback about this group. You will also be receiving a brief 10 question anonymous survey via email to help us improve the experience for participants in future projects. We appreciate all of your enthusiasm and sharing on this site and hope that you will join CarrieT's LinkedIn group to continue this community.

Access to discussions: A few of you were interested in having access to the discussions even after this forum ends. We have uploaded all the discussion topics (along with all the posts) as Word documents on the Resources tab. Go to the Resources tab, change the view (at the bottom left of the page) to 30 per page to see all the topics. You can click on each name to view or save it, or you can right-click on the name and click save target as...to download the document onto your computer. You will have until the end of May to access these. Several of you were also interested in continuing these discussions on another site, preferably LinkedIn. Is there anyone who already belongs to LinkedIn willing to start a group?

Thanks for all your feedback regarding this discussion forum. There were some really wonderful things that came out of this. A couple of you mentioned having a format like this to continue to network, share ideas, and offer support. We were wondering what interest you have in continuing your own online collaboration in something like a Yahooo or LinkedIn group.

Congratulations to CarrieT for being randomly selected as the winner of our 4th \$100 American Express gift card drawing! CarrieT and CarlaB had the most points this month. Keep posting! We'll have a final drawing in a couple of weeks, and the 3 people with the most total points will each win gift cards.

Evaluation of this forum: As we're nearing the end of this discussion forum, we would like to know how this online community has been useful to you. What have you learned? In what ways has your work or thinking been influenced by these discussions? How could this forum be improved? One of our future goals is to evaluate the effectiveness of online collaborative learning environments in improving care coordination and other health services. Your experience and insight is valuable to us.

Success stories: As we're nearing the end of our 4th month of discussions, we've learned of some of the amazing work you're doing. But we know there is so much more. Could you tell us about a success story you have had coordinating care?

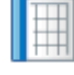

### Usage Reports
